# Supplementary material
Source: publisher site journal article supplement (https://www.spandidos-publications.com/144/downloadSupplementary)

Figure S1. Correlation between the proliferation rate and percentage of cells occupying G<sub>0</sub>/G<sub>1</sub> phase of cell cycle in HCT116-colonospheres treated with 5-FU, ASA and anti-EGFR antibody or their combinations (n=5) (Spearman's rank correlation coefficients,  $P < 0.5$ ). 5-FU, 5-fluorouracil; ASA, aspirin; EGFR, epidermal growth factor receptor.

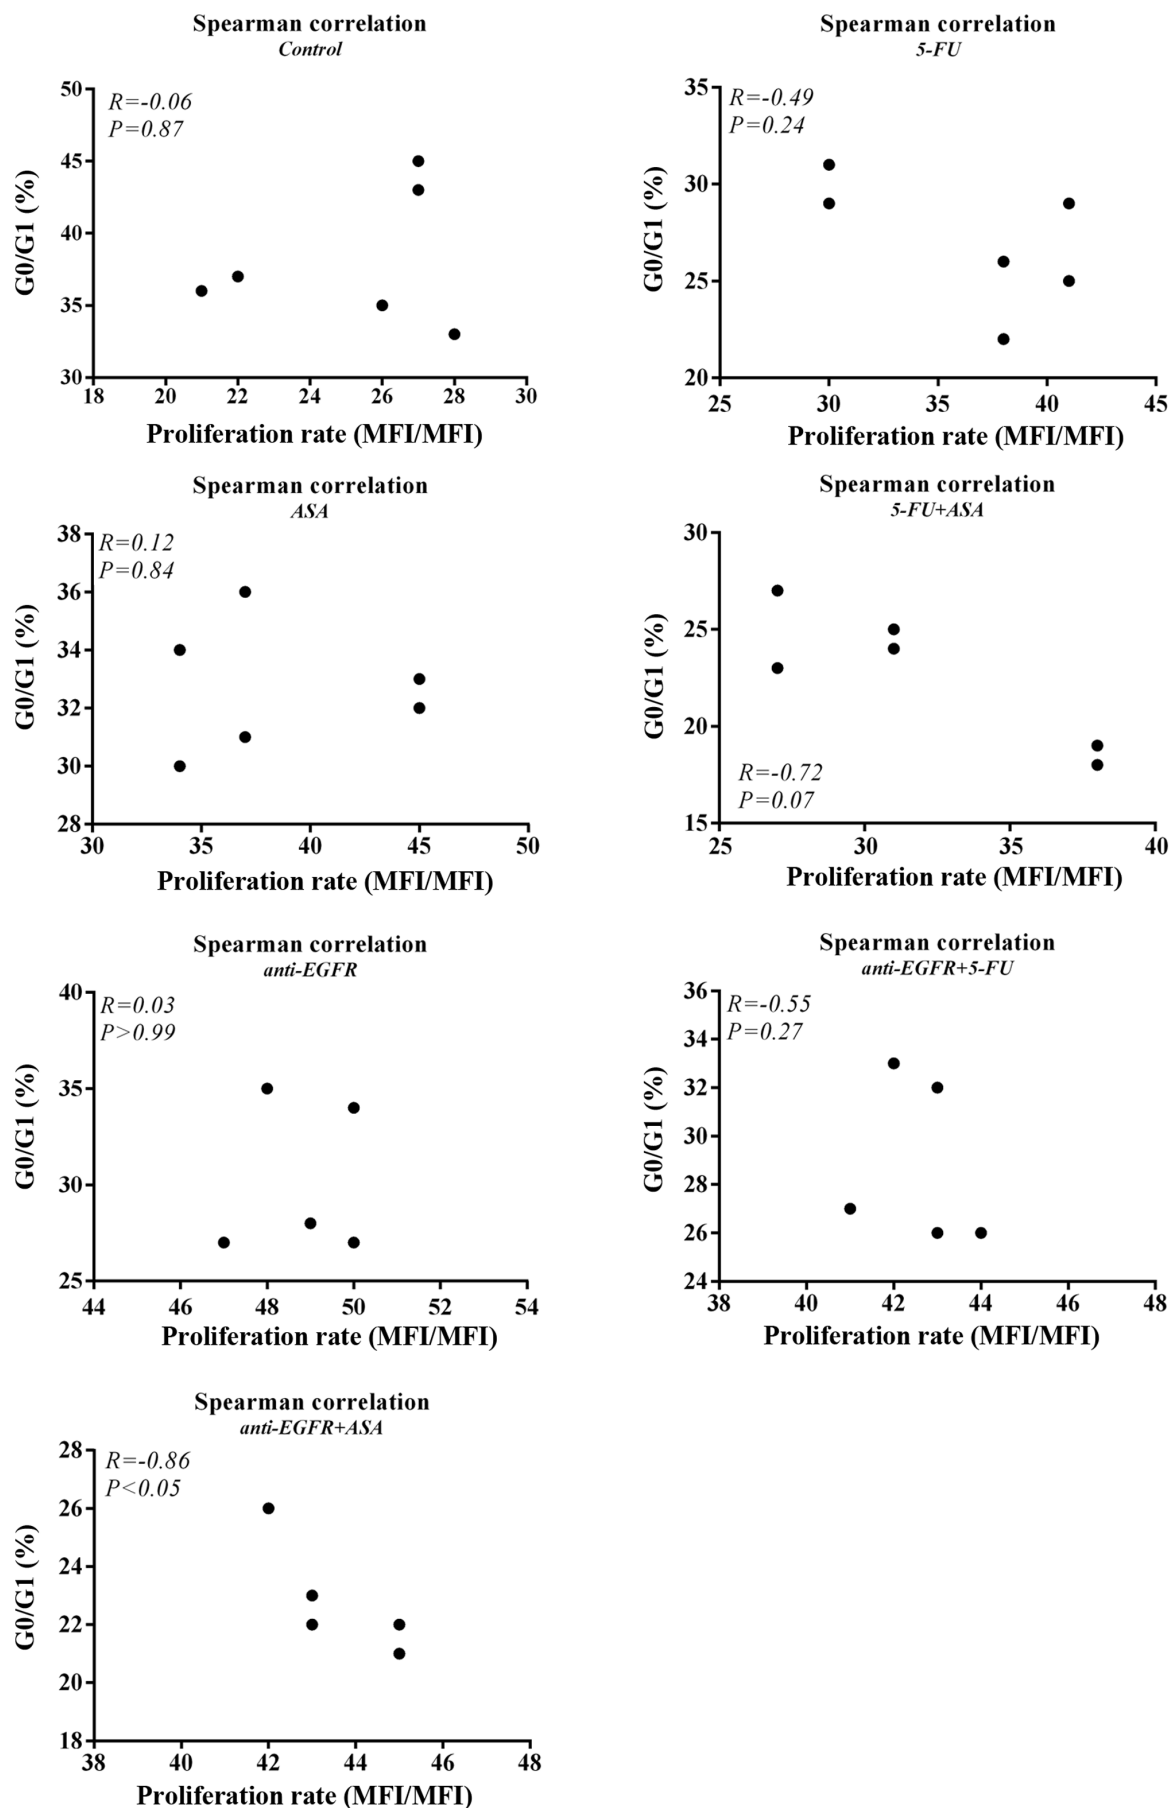

Supplement: Supplementary file 1 [file downloadSupplementary]
